# Supplementary material for: Genome of Raphanus sativus L. Bakdal, an elite line of large cultivated Korean radish
Source: Front Genet. 2024 Jan 18;15:1328050. doi: 10.3389/fgene.2024.1328050 (PMC10831357; doi:10.3389/fgene.2024.1328050)
Supplement: Supplementary file 2 [file Table1.XLSX]

## Sheet: Supplementary Table 1
	Supplementary Table 1: Summaries of identified repeat and its subtypes observed in Raphanus sativus L. Bakdal
	Total genome size	398011222
	Types	Counts	Masked length	Masked %
	Retroelements	57480	62384255	0.1567
	SINEs	-	-	0
	LINEs :	14570	10130071	0.0255
	L2/CR1/Rex	-	-	0
	L1/CIN4	14570	10130071	0.0255
	LTR elements :	42910	52254184	0.1313
	BEL/Pao	-	-	0
	Ty1/Copia	19123	20182564	0.0507
	Gypsy/DIRS1	23709	31998251	0.0804
	Retroviral	-	-	0
	DNA transposons	15877	9666733	0.0243
	hobo-Activator	1547	938308	0.0024
	Tcl-IS630-Pogo	42	26057	0.0001
	Tourist/Harbinger	2009	807843	0.002
	Rolling-circles	3897	2198764	0.0055
	Unclassified	320246	120167311	0.3019
	Small RNA	-	-	0
	Satellites	-	-	0
	Simple repeats	87099	3707841	0.0096
	Low complexity	19105	997450	0.0025
	Bases masked		199122354	0.5003

## Sheet: Supplementary Table 2
	Supplementary Table 2: Chromosome sequences comparison between Raphanus sativus L. Bakdal and R. sativus cv. WK10039
		Rs2.0			SJ1.0 -5kb		SJ1.0-5kb
							ragtag
	Chromosomes /Contigs	# of	len.	Gaps (bp, %)	# of scaffolds	len. scaffolds	# of scaffold	len. scaffolds	# of contigs	len. contigs	Gaps (bp, %)
		scaffolds	scaffolds
	Chr1	1	26279342	18,200 (0.07%)	1	28720022	1	28876524	14	28875224	1,300 (0.00%)
	Chr2	1	40702021	25,200 (0.06%)	1	41024075	1	41223553	22	41221453	2,100 (0.01%)
	Chr3	1	28415227	41,200 (0.14%)	1	40361493	1	40906457	38	40902757	3,700 (0.01%)
	Chr4	1	52202202	44,200 (0.08%)	1	54127229	1	54324348	22	54322248	2,100 (0.00%)
	Chr5	1	39956999	27,000 (0.07%)	1	41366061	1	41805896	39	41802096	3,800 (0.01%)
	Chr6	1	53709999	36,700 (0.07%)	1	53489299	1	53823493	33	53820293	3,200 (0.01%)
	Chr7	1	25868459	15,000 (0.06%)	1	32741467	1	32779848	6	32779348	500 (0.00%)
	Chr8	1	27228771	23,500 (0.09%)	1	33088414	1	33502294	32	33499194	3,100 (0.01%)
	Chr9	1	37282294	30,300 (0.08%)	1	40288162	1	40618245	33	40615045	3,200 (0.01%)
	Unplaced	6413	101785269	8,410 (0.01%)	795	18460338	556	15829802	565	15228582	601,220 (3.80%)
	Total	6422	433430583	269,710 (0.06%)	804	383666560	565	383690460	804	383066240	624,220 (0.16%)

## Sheet: Supplementary Table 3
	Supplementary Table 3: Summary of the list of proteomes used for Raphanus sativus L. Bakdal gene predictions.
	Input	Number of proteins (including isoforms)
	R. sativus var. WK10039 RS_1.0	56775
	R. sativus var. longipinnatus(Xin-li- mei) RS00	44109
	R. sativus var. caudatus	47156
	R. sativus var. oleiformis(Yuanmou oil)	52190
	R. sativus var.niger	46415
	R. sativus var. longipinnatus (YZ Yanzhong)	42763
	R. sativus var. longipinnatus (Moriguchi daikon)	46711
	R. sativus var. radicula	45662
	R. sativus var. raphanistroides	45305
	R. raphanistrum ssp. landra	43703
	R. raphanistrum ssp. raphanistrum	42319
	R. raphanistrum X R. sativus	45658
	Brassica rapa (Chiifu v3.5)	83440

## Sheet: Supplementary Table 4
	Supplementary Table 4: Summary of the list of gene models secured from the gene prediction pipeline used in Raphanus sativus L. Bakdal genome assembly.
	Type	Program	Source	No. gene models	Selected
	Evidenced gene model (EGM)	BUSCO	brassicales_odb10 / embryophytas_odb10	4555	50281
		Exonerate	R. sativus var. WK10039 RS_1.0	68668
			Evidenced gene model (EGM)ExonerateR. sativus var. longipinnatus (Xin-li- mei) RS00	59953
			Evidenced gene model (EGM)ExonerateR. sativus var. caudatus	56125
			Evidenced gene model (EGM)ExonerateR. sativus var. oleiformis (Yuanmou oil)	103530
			Evidenced gene model (EGM)ExonerateR. sativus var.niger	68973
			Evidenced gene model (EGM)ExonerateR. sativus var. longipinnatus (YZ Yanzhong)	66570
			Evidenced gene model (EGM)ExonerateR. sativus var. longipinnatus (Moriguchi daikon)	80135
			Evidenced gene model (EGM)ExonerateR. sativus var. radicula	64307
			Evidenced gene model (EGM)ExonerateR. sativus var. raphanistroides	67645
			Evidenced gene model (EGM)ExonerateR. raphanistrum ssp. landra	62841
			Evidenced gene model (EGM)ExonerateR. raphanistrum ssp. raphanistrum	48536
			Evidenced gene model (EGM)ExonerateR. raphanistrum X R. sativus	54794
			Evidenced gene model (EGM)ExonerateBrassica rapa (Chiifu v3.5)	606
	Predicted gene model (PGM)	Augustus	arabidopsis matrix	95707
			Custom HMM matrix	83468
		Geneid	arabidopsis matrix	26375

## Sheet: Supplementary Table 5
	Supplementary Table 5: Overview of genome assembly of available Raphanus sativus species along with Raphanus sativus L. Bakdal genome assembly.
	Lable	Source	Genome (Mb)	Scoffold /Contig	#genes	Avg. gene (bp)	Exon/	Avg.exon (bp)	Gene	BUSCO	N%	Assembly Level
				N50 (Mb)			gene		coverage
	This Study	Raphanus sativus L. Bakdal (SJ1.0)	398.01	40.36	50281	2471.04	5.32	220.16	31.22	98.7	0.19	Chromosome
	Rs1.0	R. sativus var. WK10039 RS_1.0	426.2	38.35	49,733	2,472.25	4.95	241.07	28.85	97.6	12.8	Scaffold
	Rs2.0	R. sativus var. WK10039 RS_2.0	433.84	37.28	51.317	2493.23	5.01	247.38	29.49	98.6	0.06	Chromosome
	RS00	R. sativus var. longipinnatus(Xin-li- mei) RS00	459.86	51.92	56,775	2,875.47	5.86	234.52	35.5	95.8	7.41	Chromosome
	RS01	R. sativus var. caudatus	473.78	52.08	50,040	2,412.45	5.87	215.81	25.48	93.4	0.03	Chromosome
	RS02	R. sativus var. oleiformis(Yuanmou oil)	514.68	55.46	54,597	2,395.70	6.14	208.67	25.41	95	0.02	Chromosome
	RS03	R. sativus var.niger	465.14	47.92	49,600	2,434.36	5.75	218.8	25.96	95.5	0.01	Chromosome
	RS04	R. sativus var. longipinnatus (YZ Yanzhong)	461.74	56.76	45,856	2,444.51	5.79	220.1	24.28	94.8	0.01	Chromosome
	RS05	R. sativus var. longipinnatus (Moriguchi daikon)	487.87	53.5	50,090	2,359.87	5.73	217.7	24.23	95.6	0.02	Chromosome
	RS06	R. sativus var. radicula	466.54	54.61	48,892	2,359.70	5.69	218.49	24.73	95.7	0.02	Chromosome
	RS07	R. sativus var. raphanistroides	486.35	59.37	48,342	2,417.19	5.84	217	24.03	95.4	0.02	Chromosome
	RS08	R. raphanistrum ssp. landra	418.32	43.12	46,064	2,470.65	6.12	213.24	27.21	93.7	0.02	Chromosome
	RS09	R. raphanistrum ssp. raphanistrum	421.54	45.55	44,930	2,469.99	6.02	213.92	26.33	91.9	0.02	Chromosome
	RS10	R. raphanistrum X R. sativus	488.95	54.54	48,698	2,359.75	5.7	218.15	23.5	95.5	0.02	Chromosome
